# Supplementary material for: Inclusion of a Furin Cleavage Site Enhances Antitumor Efficacy against Colorectal Cancer Cells of Ribotoxin α-Sarcin- or RNase T1-Based Immunotoxins
Source: MDPI journal article supplement (doi:10.3390/toxins11100593), 2019-10-12
Supplement: s1 [file s1]

# Supplementary Materials: Inclusion of a Furin Cleavage Site Enhances Antitumor Efficacy against Colorectal Cancer Cells of Ribotoxin $\alpha$ -Sarcin- or RNase T1-Based Immunotoxins

Javier Ruiz-de-la-Herrán, Jaime Tomé-Amat, Rodrigo Lázaro-Gorines, José G. Gavilanes and Javier Lacadena

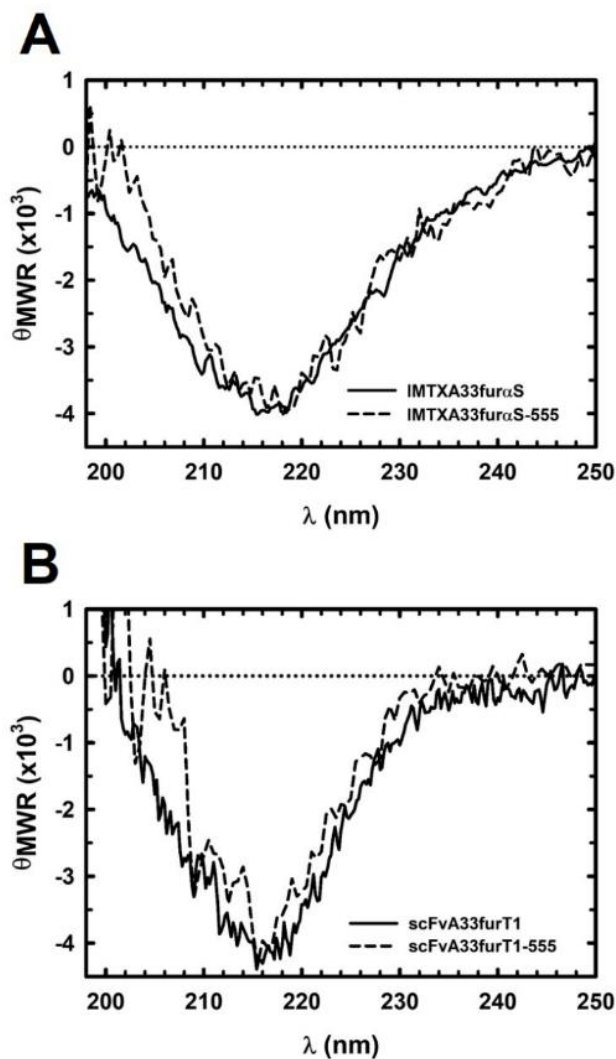

**Figure S1.** Structural characterization of Alexa-555 labelled furin-variant immunotoxins: Far-UV circular dichroism spectra ( $\theta_{MRW}$ , mean residue weight ellipticities were expressed as degree  $\times$  cm $^2$   $\times$  dmol $^{-1}$ ) of: (A) IMTXA33fur $\alpha$ S (solid line) and IMTXA33fur $\alpha$ S-555 (short dash line); (B) scFvA33furT1 and scFvA33furT1-555 (short dash line) and. Spectra were made with protein at 0.15 mg/ml in PBS.
